# Supplementary material for: Efficient photosensitized energy transfer and near-IR fluorescence from porphyrin–SWNT complexes
Source: Royal Society of Chemistry journal article supplement (doi:10.1039/b716649d), 2008-01-01
Supplement: b716649d.pdf [file b716649d.pdf]

## Efficient photosensitized energy transfer and near-IR fluorescence from porphyrin/SWNT complexes

J.P. Casey, S.M. Bachilo, and R.B. Weisman

### Supplemental Information

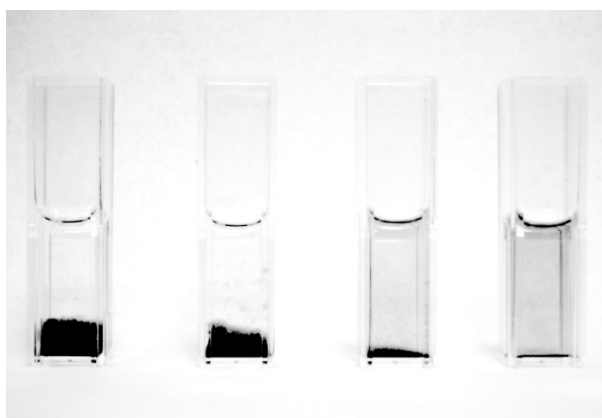

**Fig. S1** Photos of a 15 mg/L SWNT suspension in 1% TX100 1 week after preparation. From left to right: 0  $\mu\text{M}$ , 1.5  $\mu\text{M}$ , 3  $\mu\text{M}$ , and 4  $\mu\text{M}$  added TPP.
